# Supplementary material
Source: Springer Nature journal article supplement (https://www.springermedizin.de/resource/supplementary/13058_2010_2600_MOESM1_ESM.pdf/9701788)

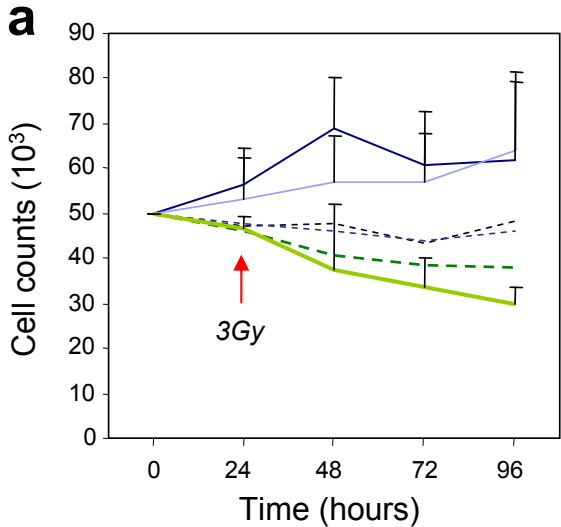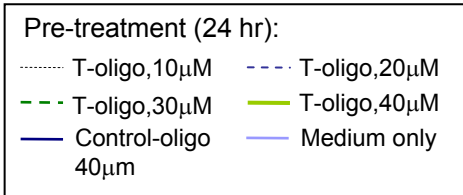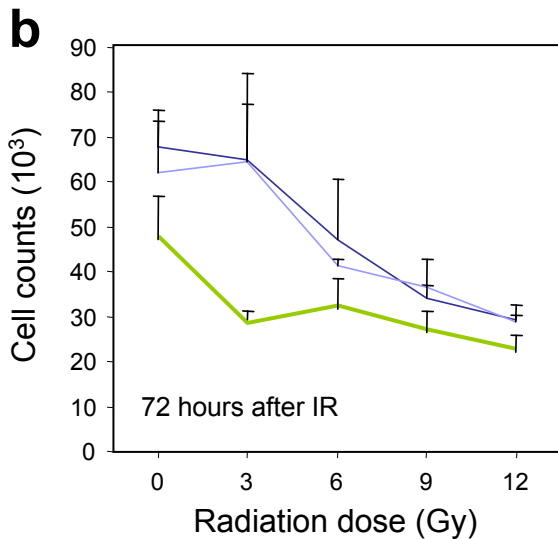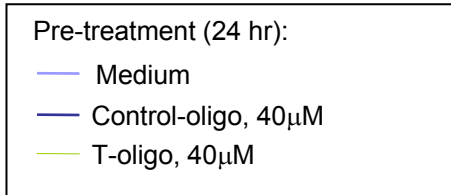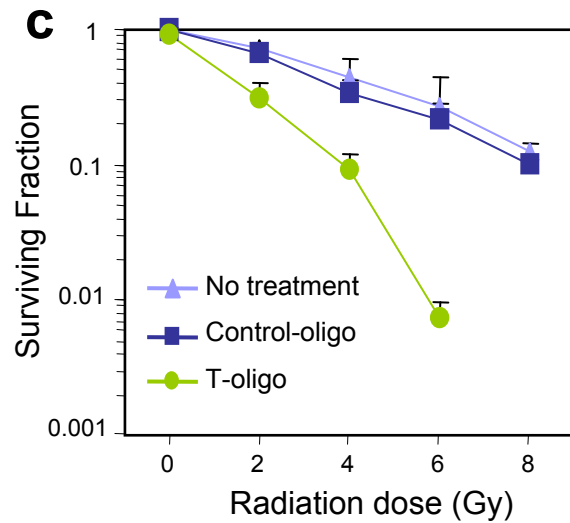

| Pre-treatment | $D_0$ | $SF_2$ |
|---------------|-------|--------|
| No treatment  | 3.36  | 0.72   |
| Control-oligo | 2.98  | 0.65   |
| T-oligo       | 1.46  | 0.31   |

Supplement: MOESM1 [file 9701788]
